# Supplementary material
Source: MDPI journal article supplement (https://www.mdpi.com/2571-550X/6/4/57)

Supplementary material of the Article “The fox from Baijiazui (Qingyang, central China) and an update on Early Pleistocene foxes from China” By Bartolini-Lucenti et al.

Table S1 – Loadings of the principal component analysis on upper teeth of fossil and extant *Vulpes* species shown in Figure 5, S1 and in Supplementary material.

|                        | PC1        | PC2      | PC3      | PC4      | PC5      | PC6      | PC7      | PC8      |
|------------------------|------------|----------|----------|----------|----------|----------|----------|----------|
| Standard Deviation     | 2.7673     | 1.1101   | 0.64745  | 0.58232  | 0.42997  | 0.4196   | 0.32231  | 0.25545  |
| Proportion of Variance | 0.7523     | 0.1211   | 0.04118  | 0.03332  | 0.01816  | 0.0173   | 0.01021  | 0.00641  |
| Cumulative Proportion  | 0.7523     | 0.8734   | 0.9146   | 0.94792  | 0.96608  | 0.9834   | 0.99359  | 1        |
|                        | PC1        | PC2      | PC3      | PC4      | PC5      | PC6      | PC7      | PC8      |
| UP3L                   | 0.46227632 | 0.065243 | 0.05409  | -0.06702 | 0.636253 | -0.59316 | 0.084813 | -0.10383 |
| UP3W                   | 0.21822103 | 0.215564 | -0.01592 | 0.239459 | -0.32002 | 0.014198 | 0.42135  | -0.75377 |
| UP4L                   | 0.59343701 | 0.108571 | -0.33414 | -0.51032 | 0.016418 | 0.510667 | 0.005807 | 0.053684 |
| UP4W                   | 0.40314308 | 0.368782 | 0.110827 | 0.661382 | -0.06746 | 0.138294 | 0.027871 | 0.476774 |
| UM1L                   | 0.34421903 | -0.23769 | 0.711392 | -0.07112 | -0.18919 | 0.07698  | -0.48399 | -0.19472 |
| UM1W                   | 0.30852889 | -0.42937 | -0.36619 | 0.024091 | -0.56123 | -0.48383 | -0.04407 | 0.186442 |
| UM2L                   | 0.06390169 | -0.4573  | 0.37606  | -0.08779 | 0.036897 | 0.144981 | 0.742196 | 0.253835 |
| UM2W                   | 0.07891841 | -0.59288 | -0.30215 | 0.476408 | 0.368536 | 0.327135 | -0.16558 | -0.23184 |

Figure S1 – 2D views of the 3D plot of the PCA on upper teeth described in the main text. Color code follows the legend of Figure 5.

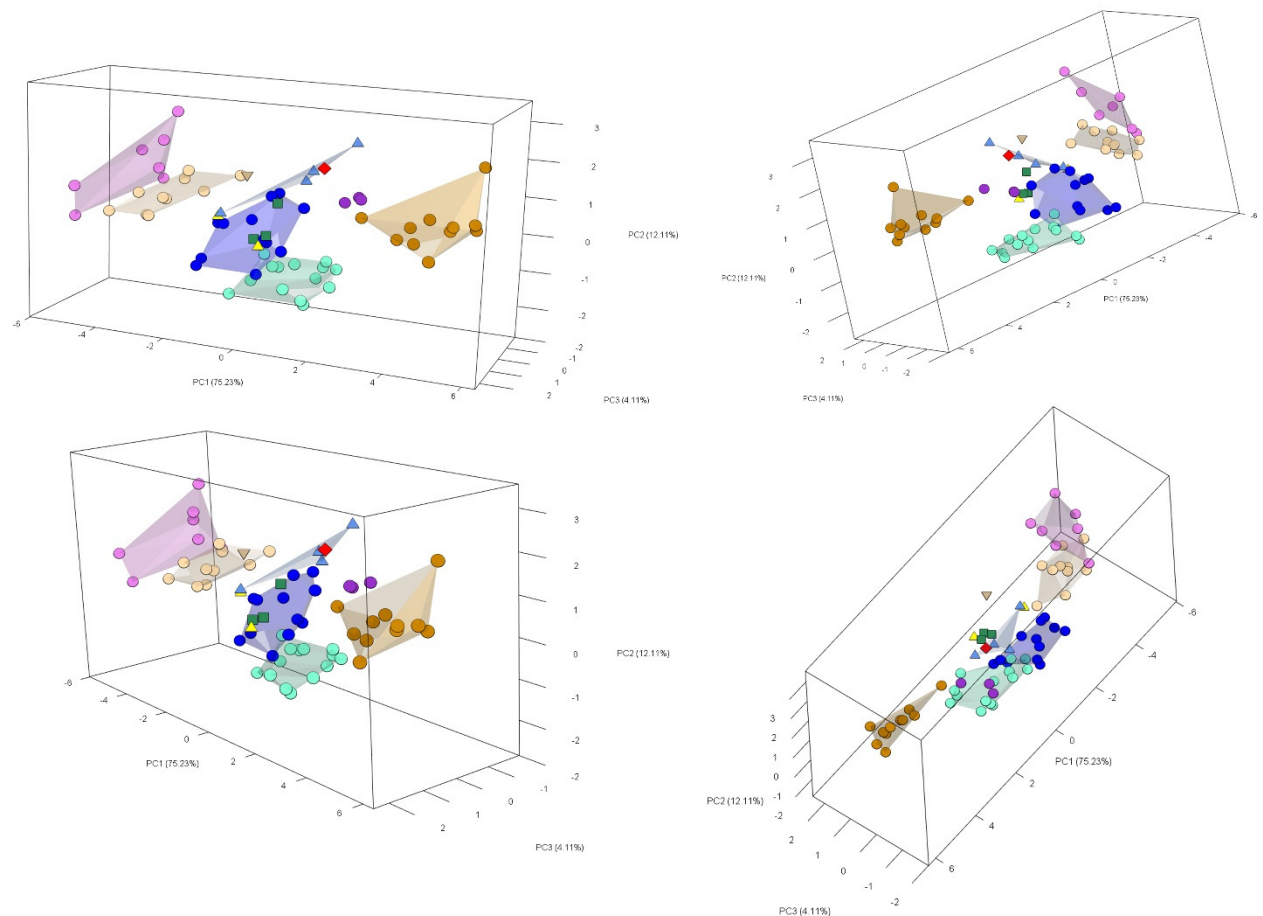

Table S2 – Loadings of the principal component analysis on lower teeth of fossil and extant *Vulpes* species shown in Figure 5, S2 and in Supplementary material.

|                        | PC1       | PC2      | PC3      | PC4      | PC5      | PC6      | PC7      | PC8      | PC9      | PC10     | PC11     |
|------------------------|-----------|----------|----------|----------|----------|----------|----------|----------|----------|----------|----------|
| Standard Deviation     | 2.9524    | 0.82318  | 0.75785  | 0.61197  | 0.44298  | 0.38497  | 0.32386  | 0.26246  | 0.2404   | 0.17223  | 0.01973  |
| Proportion of Variance | 0.7961    | 0.06189  | 0.05246  | 0.03421  | 0.01792  | 0.01354  | 0.00958  | 0.00629  | 0.00528  | 0.00271  | 0.00004  |
| Cumulative Proportion  | 0.7961    | 0.85799  | 0.91044  | 0.94465  | 0.96257  | 0.97611  | 0.98569  | 0.99198  | 0.99726  | 0.99996  | 1        |
|                        | PC1       | PC2      | PC3      | PC4      | PC5      | PC6      | PC7      | PC8      | PC9      | PC10     | PC11     |
| Lp3L                   | 0.373742  | -0.1178  | 0.167749 | 0.16887  | 0.445075 | 0.261215 | 0.222673 | 0.286476 | -0.60698 | -0.15264 | -0.0088  |
| Lp3W                   | 0.2034381 | -0.31385 | 0.043001 | -0.38441 | -0.07921 | 0.064388 | -0.10519 | 0.275764 | -0.04394 | 0.781455 | -0.0189  |
| Lp4L                   | 0.3857128 | -0.18828 | 0.199507 | 0.24388  | 0.475745 | 0.013546 | -0.14855 | -0.52253 | 0.408363 | 0.167565 | 0.005674 |
| Lp4W                   | 0.2432611 | -0.33402 | 0.031354 | -0.4304  | -0.03907 | 0.182001 | -0.46088 | 0.206354 | 0.220127 | -0.55201 | 0.014532 |
| Lm1L                   | 0.5730197 | 0.081006 | -0.16959 | 0.258197 | -0.4     | -0.26121 | -0.02343 | 0.063166 | -0.00422 | -0.03901 | -0.5791  |
| Lm1W                   | 0.2404396 | -0.05631 | -0.11762 | -0.46116 | -0.09611 | 0.135984 | 0.754955 | -0.26971 | 0.165938 | -0.12014 | 0.010831 |
| Lm1tdL                 | 0.2369413 | -0.16886 | -0.70066 | 0.13208  | 0.033148 | -0.2594  | -0.05279 | 0.002579 | -0.09185 | -0.00059 | 0.572151 |
| Lm1tdW                 | 0.1159089 | 0.387357 | 0.136023 | -0.40804 | 0.405563 | -0.67988 | -0.01475 | 0.151146 | 0.001407 | -0.04109 | -0.0065  |
| Lm1trdL                | 0.3365534 | 0.248352 | 0.527385 | 0.132458 | -0.42431 | -0.01527 | 0.030201 | 0.085085 | 0.067165 | -0.00164 | 0.580028 |
| Lm2L                   | 0.1230109 | 0.52734  | -0.28095 | 0.079161 | 0.21997  | 0.435927 | 0.021303 | 0.416831 | 0.445743 | 0.101358 | -0.00099 |
| Lm2W                   | 0.1638316 | 0.46103  | -0.1419  | -0.30314 | -0.06732 | 0.2963   | -0.36054 | -0.49567 | -0.41861 | 0.072909 | 0.004506 |

Figure S2 – 2D views of the 3D plot of the PCA on lower teeth described in the main text. Color code follows the legend of Figure 6

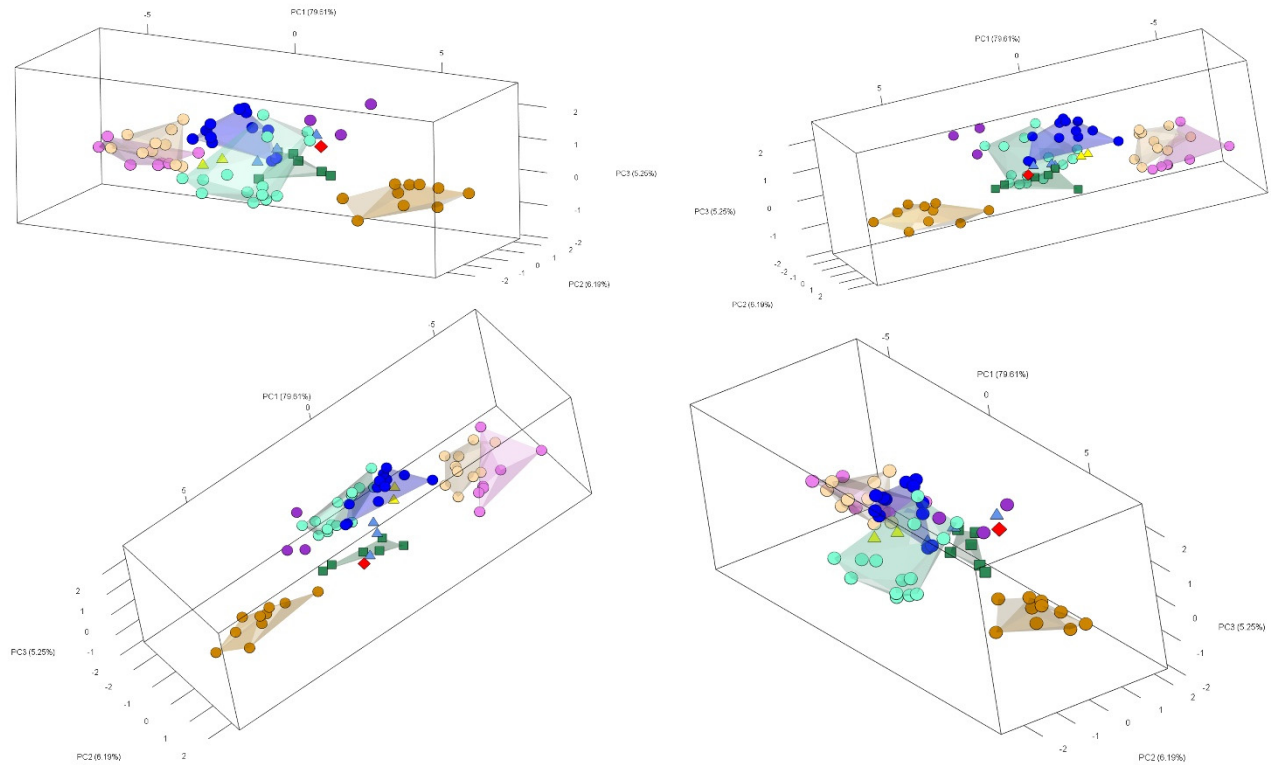

Supplement: s1 [file s1]
